# Supplementary material for: The monoplastidic bottleneck in algae and plant evolution
Source: Oxford University Press journal article supplement (doi:10.1242/jcs.203414), 2017-09-11
Supplement: jcs203414supp.pdf [file jcs203414supp.pdf]

Table S1. List of species referred to in this study

[Click here to Download Table S1](#)
